# Supplementary material for: The use of research evidence in blood collection policy and practice: a qualitative study with front- line staff, middle managers, and senior managers
Source: Research Square preprint supplement (doi:10.21203/rs.3.rs-6979390/v1), 2025-10-01
Supplement: Supplementary file 1 [file 0514c12d87e679c29f029df9.docx]

# **Interview Guide – Frontline Staff**

**Introduction**

Before we start, I would like to know a little bit more about what you do at Lifeblood.

- Can you tell me about your current role at Lifeblood?
  - How long have you been in your current position?
- When did you start to work for Lifeblood?
  - Have you changed positions since you started?
  - And in your current role, have you always worked at this donor centre?

**Research Focus 1: Implementing changes**

This study is about understanding changes made at Lifeblood that are based on research evidence. Often, changes introduced in blood collection procedures and donor management are based on findings from research conducted within Australia or internationally. These can be changes made to for example standard operating procedures, forms, equipment, donor educational materials, or donor eligibility criteria.

- Are you aware of any practice changes at your donor centre or within the wider organisation that are based on research findings?
  - [If yes:] Can you briefly describe the changes that have occurred?
  - [If no:] Examples of recent changes based on research was the removal of the vCJD deferral, the recommendation for women aged less than 46 years to take a course of iron or instructing donors to use applied muscle tension during their donation.
- How are you usually informed about any practice changes? (Prompt for method [email, staff meetings], and who informs them [manager, peer])
  - What are you usually told about the change? (Probe for reason for the change)
- How important is it to you that changes are supported by research evidence? Why? Why not?
- How often do you find that changes that are being recommended are actually being implemented into routine practice?
  - How does your team make sure that changes are implemented into routine practice?
  - How does your team make sure that changes are sustained over a longer period of time?
- Can you describe an example of a change based on research evidence in your centre that went well? Why do you think it was successful?
- Can you describe an example of a change based on research evidence in your centre that didn’t go so well? Why do you think it didn’t work?
- In your opinion, what can be improved in how changes based on research evidence are introduced?

**Research Focus 2: Knowledge translation activities**

In my next set of questions, I would like to ask you about your access to knowledge from clinical research findings and other evidence-based practices. This could be new knowledge created by researchers working at Lifeblood or from international research groups. These can be shared through presentations, summaries, or in newsletters.

- Have you ever received any information about research findings? [If yes:] How has this been shared with you?
  - What do you think of these documents/presentations? Are they easy to understand?
  - Have you shared or discussed this knowledge with your team? How?
- Do you ever look for research evidence for your work or in relation to your work? Why (not)?
  - [If yes:] How do you look for it?
- What do you think is the best way to share research evidence with you?
- Do you feel like you are you encouraged to learn about new knowledge in your role? How are you encouraged?
- Apart from this study, have you ever been asked to participate or work on a research study while working at Lifeblood?
  - [If yes:] Can you tell me more about that?
  - [If no:] What are your thoughts on being involved with research?
- What are your thoughts on your role in sharing and using research evidence at Lifeblood?

**Conclusion**

Thank you for your time today. We’re at the end of our interview. Is there anything we haven’t discussed that you would like to add?

# **Interview Guide – Middle Managers**

**Introduction**

Before we start, I would like to know a little bit more about what you do at Lifeblood.

- Can you tell me about your current role at Lifeblood?
  - How long have you been in your current position?
- When did you start to work for Lifeblood?
  - Have you changed positions since you started?
  - And in your current role, have you always worked at this donor centre?

**Research Focus 1: Implementing changes**

This study is about understanding changes made at Lifeblood that are based on research evidence. Often, changes introduced in blood collection procedures and donor management are based on findings from research conducted within Australia or internationally. These can be changes made to for example standard operating procedures, forms, equipment, donor educational materials, or donor eligibility criteria.

- Are you aware of any practice changes at your donor centre or within the wider organisation that are based on research findings?
  - [If yes:] Can you briefly describe the changes that have occurred?
  - [If no:] Examples of recent changes based on research was the removal of the vCJD deferral, the recommendation for women aged less than 46 years to take a course of iron or instructing donors to use applied muscle tension during their donation.
- How are you usually informed about any changes? (Prompt for method [email, meetings], and who informs them [manager, peer])
  - What are you usually told about the change? (Probe for reason for the change)
- How important is it to you that practice changes are supported by research evidence? Why? Why not?
- How often do you find that changes that are being recommended are actually being implemented into routine practice?
  - How do you usually make sure changes in practice are implemented in your donor centre?
  - Who is usually responsible for overseeing these changes?
  - What strategies do you use to make sure that your team sustains the change?
- Can you describe an example of a change based on research evidence in your centre that went well? Why do you think it was successful?
- Can you describe an example of a change based on research evidence that was implemented at your centre that didn’t go so well? Why do you think it didn’t work?
- In your opinion, what can be improved in how changes based on research evidence are introduced?

**Research Focus 2: Knowledge translation activities**

In my next set of questions, I would like to ask you about your access to research knowledge and evidence. This could be new knowledge created by researchers working at Lifeblood or from international research groups. These can be shared through presentations, summaries, or in newsletters.

- Have you ever received any information about research findings? [If yes:] How has this been shared with you?
  - What do you think of these documents/presentations? Are they easy to understand?
  - Is this knowledge discussed within your team? How?
- Do you ever look for research evidence for your work or in relation to your work? Why (not)?
  - [If yes:] How do you look for it?
- What do you think is the best way to share research evidence with you?
- Do you feel like you are you encouraged to learn about research and evidence in your role? How are you encouraged?
- Apart from this study, have you ever been asked to participate or work on a research study while working at Lifeblood?
  - [If yes:] Can you tell me more about that?
  - [If no:] What are your thoughts on being involved with research?
- What are your thoughts on your role in sharing and using research evidence at Lifeblood?

**Conclusion**

Thank you for your time today. We’ve reached the end of our interview. Is there anything we haven’t discussed that you would like to add?

# **Interview Guide – Executive Leaders**

**Introduction**

Before we start, I would like to know a little bit more about what you do at Lifeblood.

- Can you tell me about your current role at Lifeblood?
  - How long have you been in your current position?
- When did you start to work for Lifeblood?
  - Have you changed positions since you started?
  - Have you worked at a donor centre?

**Research Focus 1: Role of research evidence in making changes**

This study is about understanding how research evidence is used to inform policy and practice changes at Lifeblood. This can be evidence based on research conducted at Lifeblood or externally. I would now like to ask you about the role of research evidence in making changes to blood collection procedures, donor selection guidelines, and standard operating procedures at Lifeblood.

- What role, if any, does research evidence play in making any changes to blood collection procedures and guidelines?
- How important is it to you that changes to policy and practice are supported by research evidence? Why (not)?
  - Do you find internal research more compelling than international research evidence? Why (not)?
- To your knowledge, has Lifeblood undertaken internal research or commissioned external research to support policy development? [If yes] Can you give an example?
  - Has there been any research commissioned to support the implementation of a policy change? [If yes:] Can you tell me a bit more about this? [If no:] Why?
  - Has there been any research conducted to evaluate a policy change at Lifeblood? [If yes:] Can you tell me a bit more about this? [If not:] Why?
- Is it easy for you to apply research evidence to policy and procedures? Is there anything that makes this challenging or difficult?
- What do you think can be improved in how research is used to inform policy and practice changes?

**Research Focus 2: Implementing changes**

I would now like to ask you a few questions on how changes are implemented in blood donation centres.

- How do you usually tell donor centre teams that a change is being made?
  - Do you let the teams know that they are based on research evidence? Why (not)?
- How do you usually make sure that changes are implemented in donor centres?
  - Who is usually responsible for ensuring that changes in policy are implemented in practice?
- Do you work with researchers to implement changes that are based on research evidence?
- What strategies are used to make sure that the change is sustained over time?
- Is there a process for determining if policies have been successfully implemented?
  - Could you tell me a bit more about what happens if the implementation is sub-optimal?
  - What do you think could be improved in this process?
- In your opinion, what can be improved in how changes are implemented at Lifeblood?

**Research Focus 3: Knowledge translation activities**

In my next set of questions, I would like to ask you about your access to research knowledge and evidence. This could be new knowledge created by researchers working at Lifeblood or from international research groups. These can be shared through presentations, summaries, or in newsletters.

- Have you ever received any information about research findings? [If yes:] How has this been shared with you?
  - What do you think of these documents/presentations? Are they easy to understand?
  - Is this knowledge discussed within your team or senior leadership group? How?
- What do you think is the best way to share research evidence with you?
- Do you ever look for research evidence for your work or in relation to your work? Why (not)?
  - How do you look for it? (Prompt for journal alerts, conferences, ask research team)
- How easy is it for you to learn about new research and evidence in your role? Is there anything that makes it challenging or difficult?
- Do you feel like you are you encouraged to learn about research evidence in your role? How?
- Apart from this study, have you ever been asked to participate or work on a research study while working at Lifeblood?
  - [If yes:] Can you tell me more about that?
  - [If no:] What are your thoughts on being involved with research?
- What are your thoughts on your role in sharing and using research evidence at Lifeblood?

**Conclusion**

Thank you for your time today. We’ve reached the end of our interview. Is there anything we haven’t discussed that you would like to add?
